# OncoScore: an R package to measure the oncogenic potential of genes

Daniele Ramazzotti\*<sup>1</sup>, Luca De Sano<sup>2</sup>, Roberta Spinelli<sup>3</sup>, Rocco Piazza<sup>3</sup>, and Carlo Gambacorti Passerini<sup>3</sup>

<sup>1</sup>Dept. of Pathology, Stanford University, Stanford, CA, USA

<sup>2</sup>Department of Informatics, University of Milano-Bicocca, Milan, Italy

<sup>3</sup>Department of Medicine and Surgery, University of Milano-Bicocca, Milan, Italy

## Abstract

**Motivation:** We here present OncoScore, an open-source tool and R package that implements a novel text-mining method capable of ranking genes according to their association to cancer, based on available biomedical literature on PubMed. OncoScore can scan the biomedical literature with dynamically updatable web queries and measure the association to cancer of each gene by considering their citations. The output of the tool is a score that is measuring the strength of the association of the genes to cancer at the time of the analysis.

**Availability and Implementation:** OncoScore is available on GitHub and as an R package on bioconductor.org. Furthermore, the queries to OncoScore can also be performed at <http://www.galseq.com/oncoscore.html>

**Contact:** [daniele.ramazzotti@stanford.edu](mailto:daniele.ramazzotti@stanford.edu) or [l.desano@campus.unimib.it](mailto:l.desano@campus.unimib.it)

**Supplementary information:** Supplementary data are available at *Bioinformatics* online.

## 1 Introduction

The NGS revolution has been contributing to decipher novel genes and genetic mechanism connected to cancer [1]. However, the always increasing amount of available genomics data together with new discoveries, is also posing new challenges to researchers, such as the one of prioritizing cancer genes among all the variants generated by NGS experiments. In fact, while a lot of efforts have been made to predict novel cancer driver genes, tools capable of automatically measure the association to cancer of genes based on the currently available in scientific literature are currently limited.

To overcome these limitations, in [2] we proposed OncoScore, a bioinformatics text-mining tool to automatically measure, with dynamically updatable web

---

\*To whom correspondence should be addressed.

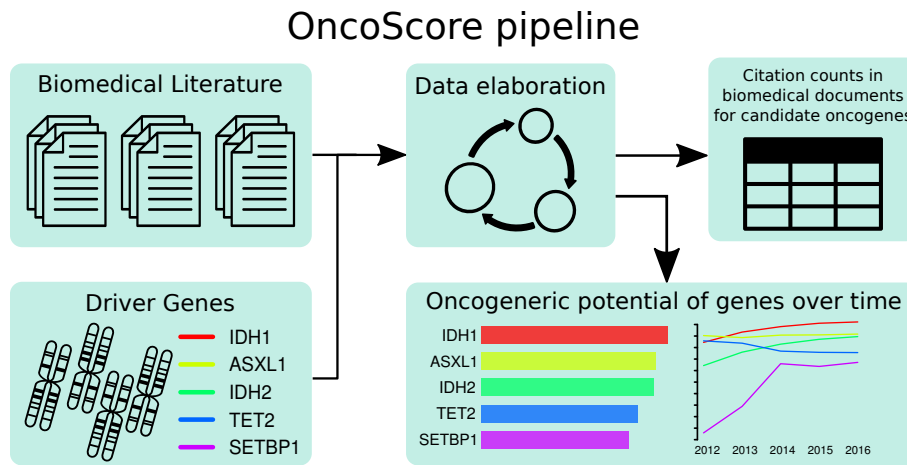

Figure 1: The input of the OncoScore pipeline is a set of candidate driver genes or a chromosomal region and all the genes within. For these genes, the tool scans the biomedical literature (i.e., PubMed scientific papers) and automatically retrieves citation counts for all the genes. Then, the oncogenic potential of each of the candidate driver genes is assessed. This analysis can also be repeated over a time line in order to analyze the trends of oncogenicity of the genes over time.

queries to the biomedical literature, the association of genes to cancer based on genes citations. The output of the tool is a score that measures the strength of the association of any gene to cancer.

The latest version of OncoScore is available on Github at the development branch of <https://github.com/danro9685/OncoScore> and on Bioconductor as a R package at [bioconductor.org](http://bioconductor.org). This version of the tool allows full customization of the algorithm and can be easily integrated in existing NGS pipelines. Furthermore, we also provide a web interface of the method which allows an easier access to researchers with limited experience in bioinformatics (see the Website <http://www.galseq.com/oncoscore.html>).

## 2 OncoScore analysis

The OncoScore analysis consists of two parts. One can estimate the oncogenic potential of a set of genes given the literature knowledge at the time of the analysis, or one can study the trend of such oncogenic potential over time. See Figure 2 for an overview on the OncoScore pipeline and the Supplementary Material for a detailed description of the software with examples.

OncoScore provides a set of functions to dynamically perform web queries to the biomedical literature in real time. The user can specify a set of genes and aliases to be considered in the queries. Furthermore, it is also possible to specify a set of dates and in this case the tool will retrieve only the literature up to these moments in order to assess the association to cancer of the considered genes at these specific times. Once the queries are performed, it is possible to measure the oncogenic potentials of the genes by means of a number representing the

strength of the association of any gene to cancer.

The OncoScore analysis is particularly useful when considering copy number alterations. These genomic rearrangements can involve dozens or even hundreds of genes. To this extent, OncoScore provides functions to retrieve the names of the genes in a given portion of a chromosome together with functions to automatically perform the whole pipeline for all the genes within an chromosomal region, without the need of directly specify the gene names.

As above mentioned, the tool also provides the opportunity of computing the OncoScore at different user-defined moment in time. This is useful to study the trend through the literature for specific genes.

Finally, the tool provides functions to plot the results on the retrieves genes or chromosomal regions. It is possible to plot the OncoScores as bar plots when performing the standard analysis and as line plots for the analysis of genes trends through time.

### 3 Conclusions

OncoScore is an open-source tool capable of ranking genes according to their association to cancer, based on available biomedical literature on PubMed. The tool can perform dynamically updatable web queries to the biomedical literature in real-time and measure the oncogenetic potential of genes. The output of the analysis is a score that measures the strength of the association of the genes to cancer at the time of the execution.

OncoScore analysis on NGS data on both variants and chromosomal regions shows the utility of this tool when performing the crucial task of cancer gene prioritization.

### References

- [1] Bert Vogelstein and Kenneth W Kinzler. Cancer genes and the pathways they control. *Nature medicine*, 10(8):789–799, 2004.
- [2] Rocco Piazza, Daniele Ramazzotti, Roberta Spinelli, Alessandra Pirola, Luca De Sano, Pierangelo Ferrari, Vera Magistroni, Nicoletta Cordani, Nitesh Sharma, and Carlo Gambacorti-Passerini. Oncoscore: a novel, internet-based tool to assess the oncogenic potential of genes. *Scientific Reports*, 2017.

# OncoScore: an R package to measure the oncogenic potential of genes

*Supplementary Information*

Daniele Ramazzotti\*    Luca De Sano\*    Roberta Spinelli  
Rocco Piazza        Carlo Gambacorti Passerini

OncoScore is a tool to measure the association of genes to cancer based on citation frequency in biomedical literature. The score is evaluated from PubMed literature by dynamically updatable web queries.

## 1 Installation

The *OncoScore R package* is available on *Bioconductor* at <https://bioconductor.org/packages/release/bioc/html/OncoScore.html> and can be installed as follows.

```
## try http:// if https:// URLs are not supported
source("https://bioconductor.org/biocLite.R")
biocLite("OncoScore")
```

The package is also available on *Github* at <https://github.com/danro9685/OncoScore>. It is possible to install both the master (stable) and development versions of the R package by using the R library *devtools*.

```
library(devtools)
install_github("danro9685/OncoScore", ref = 'master')
library(OncoScore)

library(devtools)
install_github("danro9685/OncoScore", ref = 'development')
library(OncoScore)
```

## 2 Examples

The OncoScore analysis consists of two parts. One can estimate a score to assess the oncogenic potential of a set of genes, given the literature knowledge, at the time of the analysis, or one can study the trend of such score over time.

---

\*Equal contributors.

We next present the two analysis and we conclude with showing the capabilities of the tool to visualize the results. First we load the library.

```
library(OncoScore)
```

## 2.1 OncoScore analysis

The query that we show next retrieves from PubMed the citations, at the time of the query, for a list of genes in cancer related and in all the documents.

```
query = perform.query(c("ASXL1", "IDH1", "IDH2", "SETBP1", "TET2"))
```

```
### Starting the queries for the selected genes.
```

```
### Performing queries for cancer literature
```

```
Number of papers found in PubMed for ASXL1 was: 309
Number of papers found in PubMed for IDH1 was: 1450
Number of papers found in PubMed for IDH2 was: 557
Number of papers found in PubMed for SETBP1 was: 69
Number of papers found in PubMed for TET2 was: 560
```

```
### Performing queries for all the literature
```

```
Number of papers found in PubMed for ASXL1 was: 350
Number of papers found in PubMed for IDH1 was: 1581
Number of papers found in PubMed for IDH2 was: 648
Number of papers found in PubMed for SETBP1 was: 89
Number of papers found in PubMed for TET2 was: 717
```

OncoScore also provides a function to retrieve the names of the genes in a given portion of a chromosome that can be exploited if we are dealing, e.g., with copy number alterations hitting regions rather than specific genes.

```
> chr13 = get.genes.from.biomart(chromosome=13,start=54700000,end=72800000)
> head(chr13)
```

```
[1] "LINC00374" "RNA5SP30" "RNU7-87P" "HNF4GP1" "RN7SL375P" "BORA"
```

Furthermore, one can also automatically perform the OncoScore analysis on chromosomal regions as follows:

```
> result = compute.oncoscore.from.region(10, 100000, 500000)
```

```
### Performing query on BioMart
```

```
### Performing web query on: RNA5SP297 RNA5SP298 RN7SL754P ZMYND11 DIP2C
```

```
### Starting the queries for the selected genes.
```

```
### Performing queries for cancer literature
```

```
Number of papers found in PubMed for RNA5SP297 was: -1
Number of papers found in PubMed for RNA5SP298 was: -1
Number of papers found in PubMed for RN7SL754P was: -1
Number of papers found in PubMed for ZMYND11 was: 27
Number of papers found in PubMed for DIP2C was: 1
```

```
### Performing queries for all the literature
```

```
Number of papers found in PubMed for RNA5SP297 was: -1
Number of papers found in PubMed for RNA5SP298 was: -1
Number of papers found in PubMed for RN7SL754P was: -1
Number of papers found in PubMed for ZMYND11 was: 45
Number of papers found in PubMed for DIP2C was: 3
```

```
### Processing data
```

```
### Computing frequencies scores
```

```
### Estimating oncogenes
```

```
### Results:
```

```
RNA5SP297 -> 0
RNA5SP298 -> 0
RN7SL754P -> 0
ZMYND11 -> 49.07473
DIP2C -> 12.30234
```

We now compute a score for each of the genes, to estimate their oncogenic potential.

```
> result = compute.oncoscore(query)
```

```
### Processing data
```

```
### Computing frequencies scores
```

```
### Estimating oncogenes
```

```
### Results:
```

```
ASXL1 -> 77.8392
IDH1 -> 83.08351
IDH2 -> 76.75356
SETBP1 -> 65.556
TET2 -> 69.86954
```

## 2.2 OncoScore timeline analysis

The query that we show next retrieves from PubMed the citations, at specified time points, for a list of genes in cancer related and in all the documents.

```
> query.timepoints = perform.query.timeseries(c("ASXL1", "IDH1", "IDH2",
"SETBP1", "TET2"), c("2012/03/01", "2013/03/01", "2014/03/01",
"2015/03/01", "2016/03/01"))
```

```

### Starting the queries for the selected genes.
### Querying PubMed for timepoint 2012/03/01
### Performing queries for cancer literature
Number of papers found in PubMed for ASXL1 was: 83
Number of papers found in PubMed for IDH1 was: 408
Number of papers found in PubMed for IDH2 was: 172
Number of papers found in PubMed for SETBP1 was: 5
Number of papers found in PubMed for TET2 was: 169
### Performing queries for all the literature
Number of papers found in PubMed for ASXL1 was: 91
Number of papers found in PubMed for IDH1 was: 488
Number of papers found in PubMed for IDH2 was: 234
Number of papers found in PubMed for SETBP1 was: 10
Number of papers found in PubMed for TET2 was: 196
### Querying PubMed for timepoint 2013/03/01
### Performing queries for cancer literature
Number of papers found in PubMed for ASXL1 was: 132
Number of papers found in PubMed for IDH1 was: 662
Number of papers found in PubMed for IDH2 was: 267
Number of papers found in PubMed for SETBP1 was: 11
Number of papers found in PubMed for TET2 was: 254
### Performing queries for all the literature
Number of papers found in PubMed for ASXL1 was: 149
Number of papers found in PubMed for IDH1 was: 753
Number of papers found in PubMed for IDH2 was: 336
Number of papers found in PubMed for SETBP1 was: 18
Number of papers found in PubMed for TET2 was: 302
### Querying PubMed for timepoint 2014/03/01
### Performing queries for cancer literature
Number of papers found in PubMed for ASXL1 was: 185
Number of papers found in PubMed for IDH1 was: 903
Number of papers found in PubMed for IDH2 was: 364
Number of papers found in PubMed for SETBP1 was: 29
Number of papers found in PubMed for TET2 was: 342
### Performing queries for all the literature
Number of papers found in PubMed for ASXL1 was: 208
Number of papers found in PubMed for IDH1 was: 1002
Number of papers found in PubMed for IDH2 was: 439
Number of papers found in PubMed for SETBP1 was: 36
Number of papers found in PubMed for TET2 was: 430
### Querying PubMed for timepoint 2015/03/01
### Performing queries for cancer literature
Number of papers found in PubMed for ASXL1 was: 250
Number of papers found in PubMed for IDH1 was: 1188
Number of papers found in PubMed for IDH2 was: 467
Number of papers found in PubMed for SETBP1 was: 49

```

```

Number of papers found in PubMed for TET2 was: 452
### Performing queries for all the literature
Number of papers found in PubMed for ASXL1 was: 283
Number of papers found in PubMed for IDH1 was: 1300
Number of papers found in PubMed for IDH2 was: 550
Number of papers found in PubMed for SETBP1 was: 64
Number of papers found in PubMed for TET2 was: 576
### Querying PubMed for timepoint 2016/03/01
### Performing queries for cancer literature
Number of papers found in PubMed for ASXL1 was: 309
Number of papers found in PubMed for IDH1 was: 1446
Number of papers found in PubMed for IDH2 was: 557
Number of papers found in PubMed for SETBP1 was: 69
Number of papers found in PubMed for TET2 was: 558
### Performing queries for all the literature
Number of papers found in PubMed for ASXL1 was: 350
Number of papers found in PubMed for IDH1 was: 1576
Number of papers found in PubMed for IDH2 was: 648
Number of papers found in PubMed for SETBP1 was: 89
Number of papers found in PubMed for TET2 was: 715

```

We now compute a score for each of the genes, to estimate their oncogenic potential at specified time points.

```

> result.timeseries = compute.oncoscore.timeseries(query.timepoints)

### Computing oncoscore for timepoint 2012/03/01
### Processing data
### Computing frequencies scores
### Estimating oncogenes
### Results:
      ASXL1 -> 77.19348
      IDH1  -> 74.24489
      IDH2  -> 64.1649
      SETBP1 -> 34.9485
      TET2  -> 74.90108
### Computing oncoscore for timepoint 2013/03/01
### Processing data
### Computing frequencies scores
### Estimating oncogenes
### Results:
      ASXL1 -> 76.31902
      IDH1  -> 78.71551
      IDH2  -> 69.99559
      SETBP1 -> 46.4559
      TET2  -> 73.89695

```



```

### Computing oncoscore for timepoint 2014/03/01
### Processing data
### Computing frequencies scores
### Estimating oncogenes
### Results:
      ASXL1 -> 77.39202
      IDH1  -> 81.07946
      IDH2  -> 73.46995
      SETBP1 -> 64.97398
      TET2  -> 70.44331
### Computing oncoscore for timepoint 2015/03/01
### Processing data
### Computing frequencies scores
### Estimating oncogenes
### Results:
      ASXL1 -> 77.49295
      IDH1  -> 82.55032
      IDH2  -> 75.58179
      SETBP1 -> 63.80208
      TET2  -> 69.91466
### Computing oncoscore for timepoint 2016/03/01
### Processing data
### Computing frequencies scores
### Estimating oncogenes
### Results:
      ASXL1 -> 77.8392
      IDH1  -> 83.11346
      IDH2  -> 76.75356
      SETBP1 -> 65.556
      TET2  -> 69.81125

```

### 2.3 Visualization of the results

We next plot the scores measuring the oncogenetic potential of the considered genes as a barplot (see Figure 1).

```
> plot.oncoscore(result, col = 'darkblue')
```

We finally plot the trend of the scores over the considered times as absolute and values and as relative variations (see Figures 2, 3, 4).

```
> plot.oncoscore.timeseries(result.timeseries)
```

```
> plot.oncoscore.timeseries(result.timeseries,
  incremental = TRUE,
  ylab='absolute variation')
```

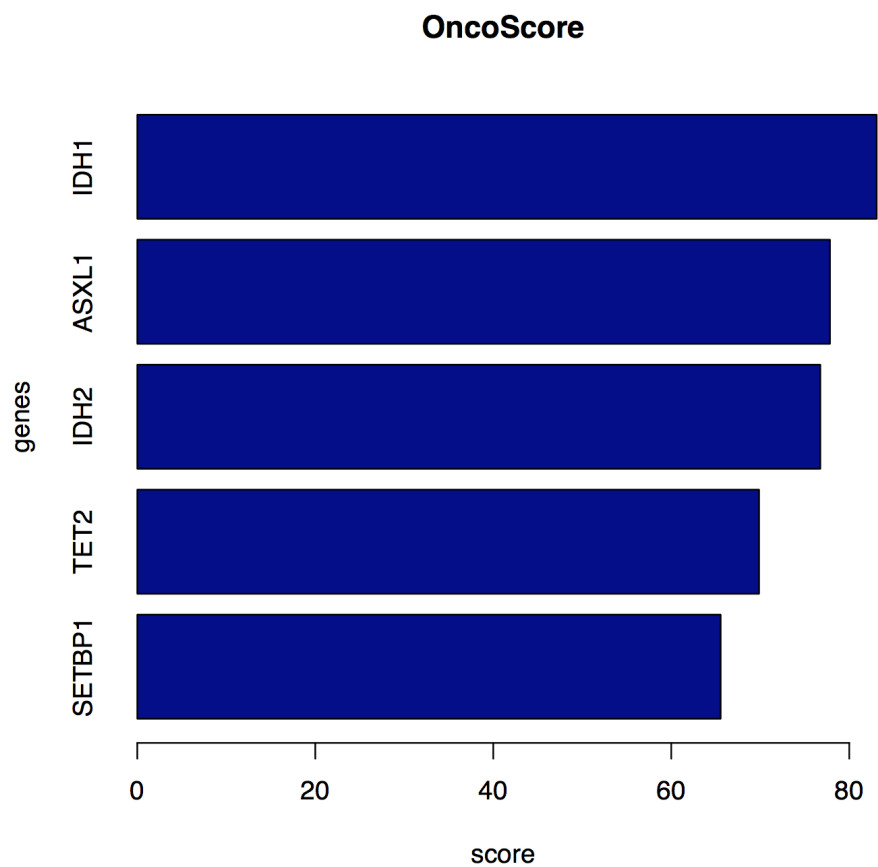

Figure 1: Oncogenetic potential of the considered genes.

```
plot.oncoscore.timeseries(result.timeseries,  
  incremental = TRUE,  
  relative = TRUE,  
  ylab='relative variation')
```

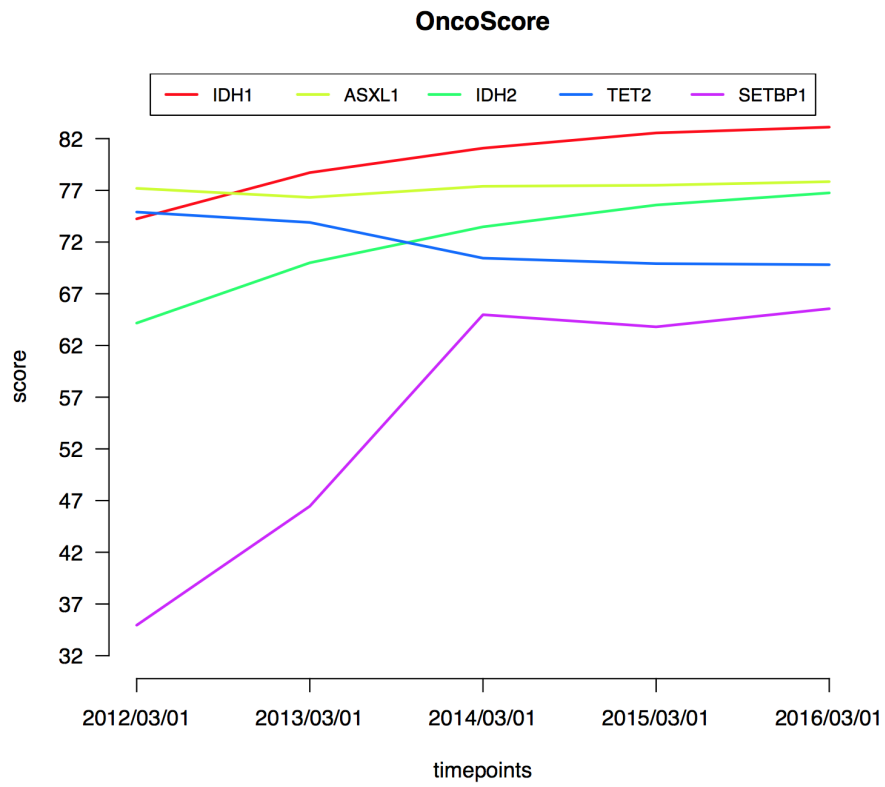

Figure 2: Absolute values of the oncogenetic potential of the considered genes over times.

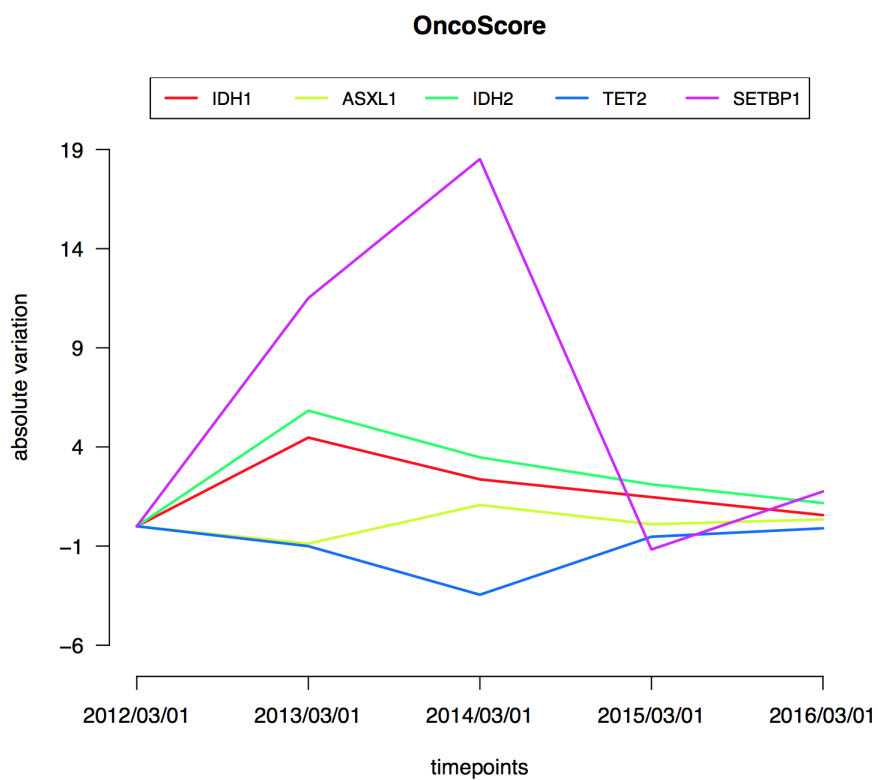

Figure 3: Variations of the oncogenetic potential of the considered genes over times.

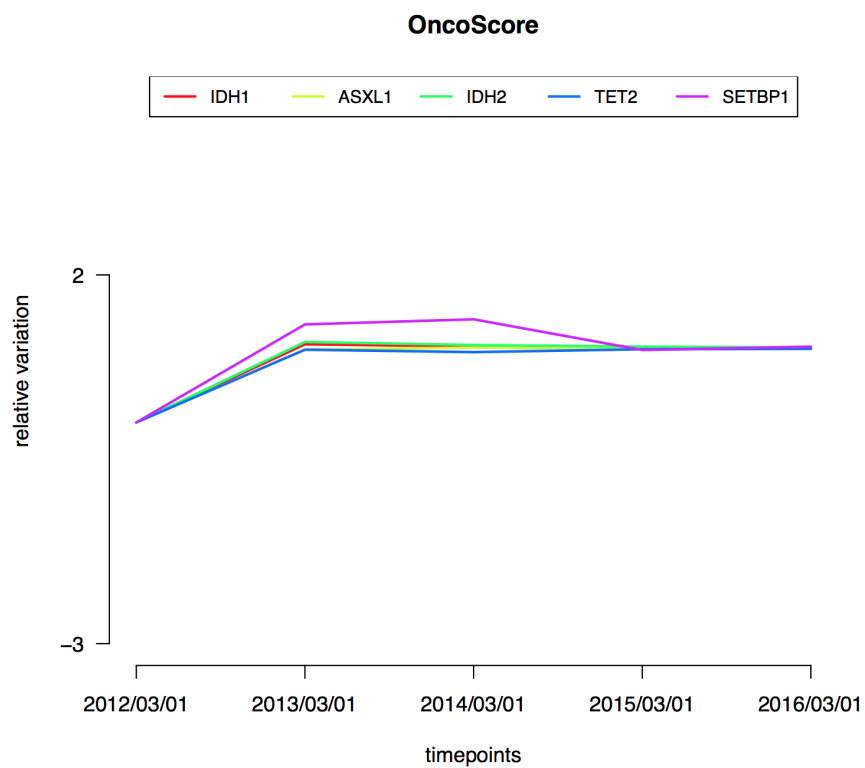

Figure 4: Variations as relative values of the oncogenetic potential of the considered genes over times.
